# Supplementary material for: Efficiently texturing hierarchical superhydrophobic fluoride-free translucent films by AACVD with excellent durability and self-cleaning ability
Source: Royal Society of Chemistry journal article supplement (doi:10.1039/c8ta05402a), 2018-01-01
Supplement: c8ta05402a1.pdf [file c8ta05402a1.pdf]

## *Supporting Information*

### **Efficiently texturing hierarchical superhydrophobic fluoride-free translucent films by AACVD with excellent durability and self-cleaning ability**

Shuhui Li,<sup>a,b</sup> Kristopher Page,<sup>b</sup> Sanjayan Sathasivam,<sup>b</sup> Frances L. Heale,<sup>b</sup> Guanjie He,<sup>b</sup> Yao Lu,<sup>c</sup> Yuekun Lai,<sup>a,d\*</sup> Guoqiang Chen,<sup>a</sup> Claire J. Carmalt<sup>b</sup> and Ivan P. Parkin<sup>b\*</sup>

<sup>a</sup>*National Engineering Laboratory for Modern Silk, College of Textile and Clothing Engineering, Soochow University, Suzhou 215123, China*

<sup>b</sup>*Department of Chemistry, University College London, London, WC1H 0AJ, United Kingdom*

<sup>c</sup>*Department of Mechanical Engineering, University College London, Torrington Place, London, WC1E 7JE, United Kingdom*

<sup>d</sup>*College of Chemical Engineering, Fuzhou University, Fuzhou 350116, China*

\*Corresponding author, E-mail: yklai@suda.edu.cn; E-mail: i.p.parkin@ucl.ac.uk.

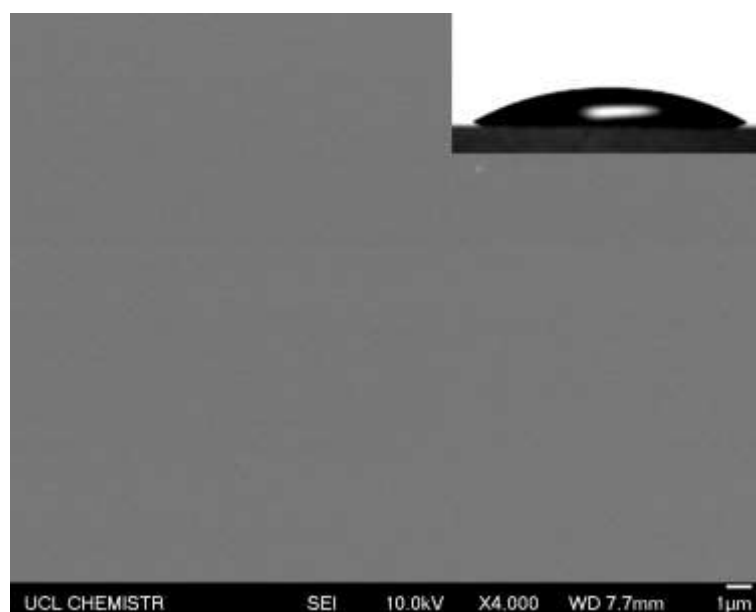

**Fig. S1** The SEM surface morphology of blank glass and the water contact angle.

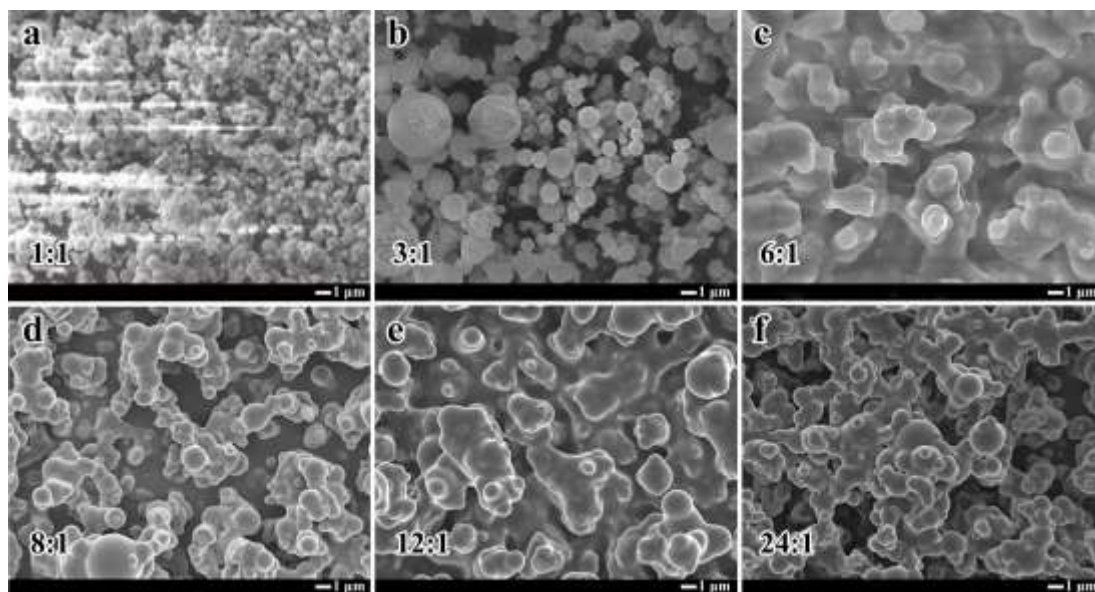

**Fig. S2** The SEM images of as-prepared superhydrophobic PDMS/TEOS@glass surfaces with different volume ratios of precursor PDMS and TEOS: (a) 1:1, (b) 3:1, (c) 6:1, (d) 8:1, (e) 12:1, (f) 24:1.

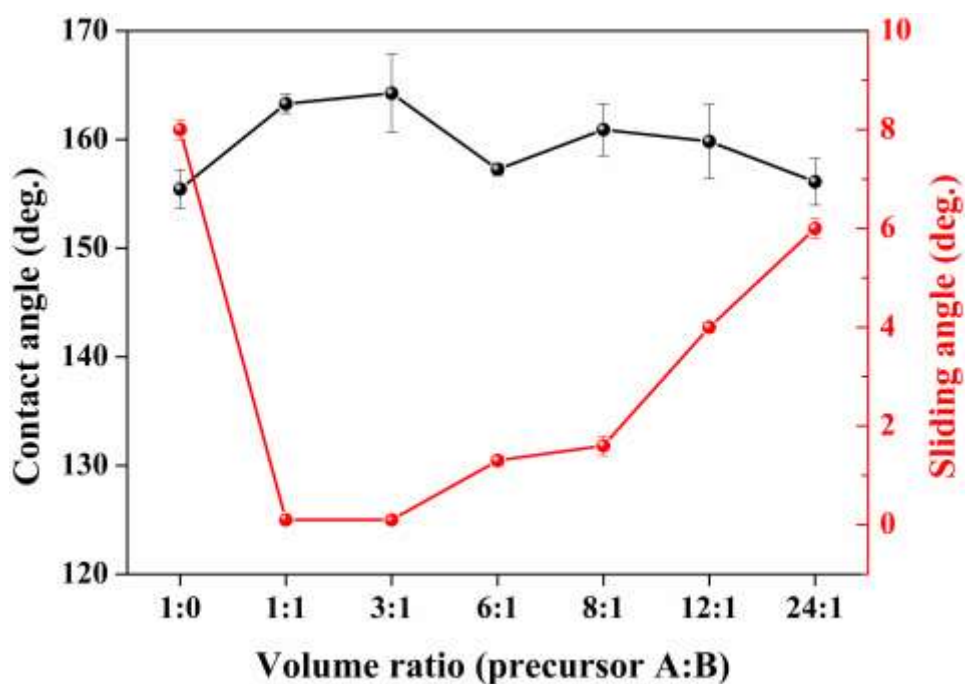

**Fig. S3** The relationship of contact angle and sliding angle for as-prepared superhydrophobic PDMS/TEOS@glass surfaces with different volume ratios of precursor PDMS and TEOS.

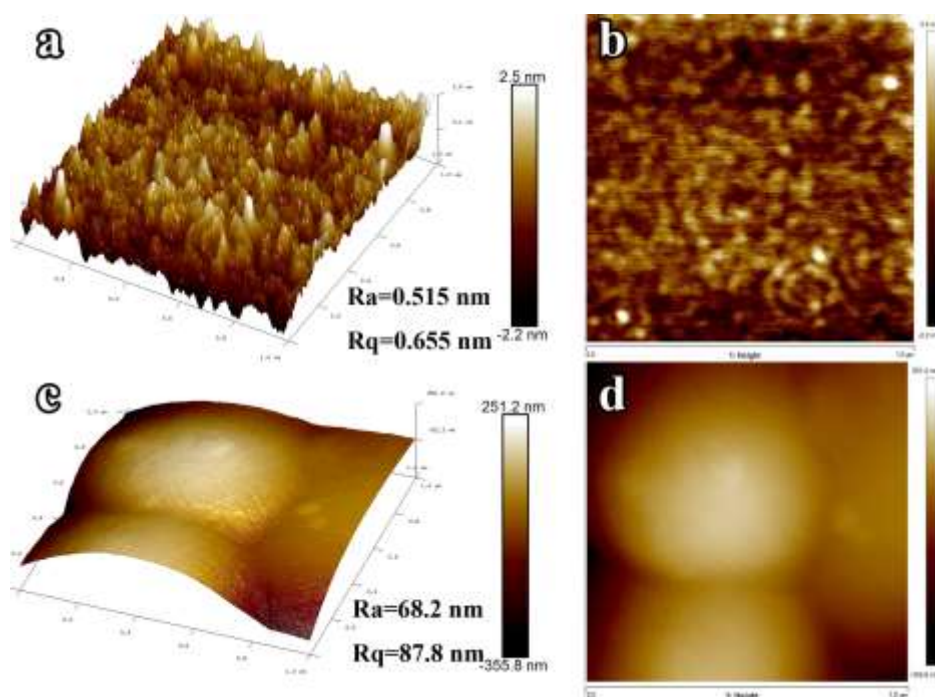

**Fig. S4** The AFM surface morphology of blank glass and PDMS/TEOS@glass prepared for 5 min.

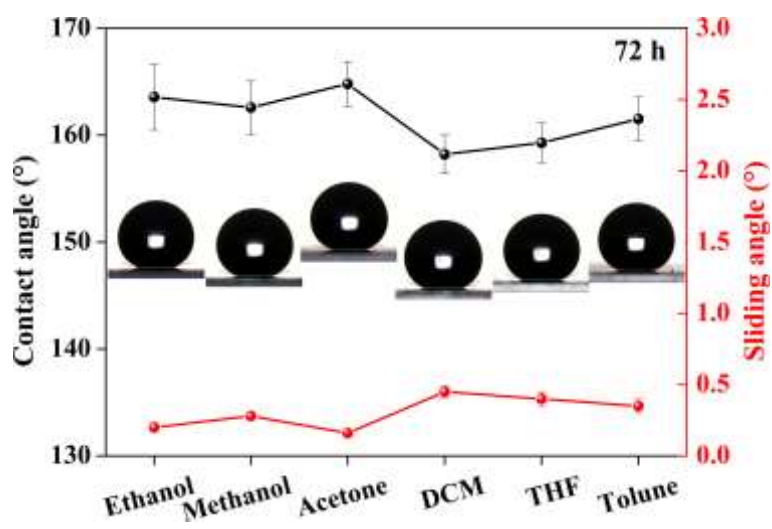

**Fig. S5** The organic solvent-resistance property of as-prepared PDMS/TEOS@glass superhydrophobic surfaces.

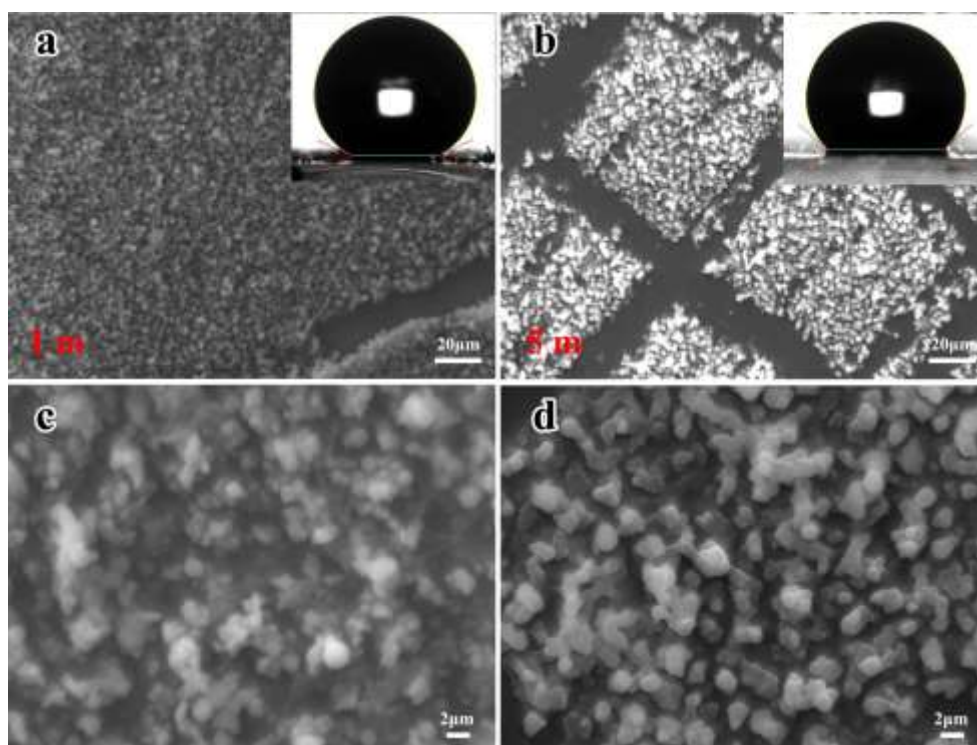

**Fig. S6** The top-down SEM and contact angles on superhydrophobic glass film fabricated at 330°C after sandpaper abrasion for 1 m (a, c) and 5 m (b, d).
